# Supplementary material for: Improving luminescence thermometry based on non-thermally coupled levels of double luminescent ionic centers Tm3+ and Ho3+ in NaYF4:Yb/Tm@NaYF4:Yb/Ho microcrystals
Source: Royal Society of Chemistry journal article supplement (doi:10.1039/d3ce00659j), 2023-09-09
Supplement: d3ce00659j1.pdf [file d3ce00659j1.pdf]

## Supporting Information

### Improving luminescence thermometry based on non-thermally coupled levels of double luminescence centers $\text{Tm}^{3+}$ and $\text{Ho}^{3+}$ ions in $\text{NaYF}_4:\text{Yb}/\text{Tm}@/\text{NaYF}_4:\text{Yb}/\text{Ho}$ microcrystals

Aihua Zhou,<sup>a</sup> Jiaxin Yang,<sup>b</sup> Yan Li,<sup>b</sup> Chengguo Ming,<sup>a\*</sup> Yanxue

Cai,<sup>a</sup> Yumiao Pei<sup>a</sup>

<sup>a</sup>Physics Department, School of Science, Tianjin University of Science & Technology, Tianjin

300457, People's Republic of China

<sup>b</sup>School of Physics, Nankai University, Tianjin, 300071, China

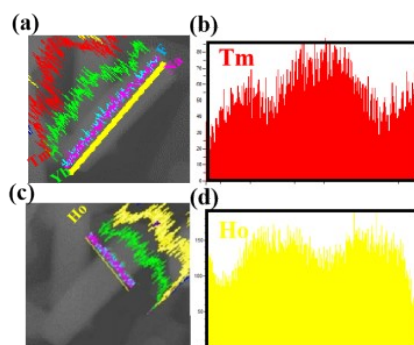

Figure S1. Line scans of the element distributions in the  $\text{NaYF}_4:\text{Yb}/\text{Tm}@/\text{NaYF}_4:\text{Yb}/\text{Ho}$  microrod along (a) the axial direction and (c) the radial direction. (b, d) The red and yellow lines represent the Tm and Ho elements.

---

\* Corresponding authors: [mingchengguo@tust.edu.cn](mailto:mingchengguo@tust.edu.cn)
